# Supplementary material for: De 'lo que falta' magdalenas y Chandhi Chowk
Source: Atypon-hosted journal article supplement (doi:10.1176/appi.ajp.2014.13111514), 2009-01-01
Supplement: 1074_ds001.pdf [file 1074_ds001.pdf]

## Appendix

**Steering Committee:** Falk Leichsenring (Chair), Manfred E Beutel, Eva Irle, Eric Leibling, Ulrich Stangier;  
**Statistics:** Johannes Hüsing; **Cognitive therapy treatment implementation unit:** Ulrich Stangier, Katrin von  
Consruch; **psychodynamic therapy treatment implementation unit:** Manfred E. Beutel, Jörg Wiltink; **Study  
Coordinators:** Eric Leibling, Simone Salzer, Falk Leichsenring. **Local representatives of cognitive therapy:**  
Wolfgang Hiller, Jürgen Hoyer, Eric Leibling, Ulrich Stangier, Ulrike Willutzki; **Local representatives of  
psychodynamic therapy:** Manfred Beutel, Peter Joraschky, Falk Leichsenring, Björn Nolting, Bernhard Strauss.
